# Supplementary material for: Microstructure of copolymeric micelles modulated by ionic liquids: investigating the role of the anion and cation
Source: Royal Society of Chemistry journal article supplement (doi:10.1039/c6ra17016a), 2016-01-01

**Table S1** Parameters obtained from DLS:

| System                                                                                                                                                                             | $R_h$ , nm | Polydispersity |
|------------------------------------------------------------------------------------------------------------------------------------------------------------------------------------|------------|----------------|
| T1304                                                                                                                                                                              | 14.1       | 0.17           |
| <b>Effect of alkyl chain length (<math>C_n\text{mimCl}</math>, <math>n=4,6,8</math> and <math>10</math>)</b>                                                                       |            |                |
| T1304 +10 mM $C_4\text{mimCl}$                                                                                                                                                     | 14.1       | 0.12           |
| T1304 +50 mM $C_4\text{mimCl}$                                                                                                                                                     | 14.1       | 0.14           |
| T1304 +10 mM $C_6\text{mimCl}$                                                                                                                                                     | 14.0       | 0.18           |
| T1304 +50 mM $C_6\text{mimCl}$                                                                                                                                                     | 13.6       | 0.20           |
| T1304 +25 mM $C_8\text{mimCl}$                                                                                                                                                     | 13.3       | 0.21           |
| T1304 +50 mM $C_8\text{mimCl}$                                                                                                                                                     | 12.1       | 0.13           |
| T1304 +25 mM $C_{10}\text{mimCl}$                                                                                                                                                  | 9.1        | 0.24           |
| T1304 +50 mM $C_{10}\text{mimCl}$                                                                                                                                                  | 7.8        | 0.29           |
| <b>Effect of anion (<math>C_8\text{mimX}</math>, <math>X=\text{Cl}^-</math>, <math>\text{BF}_4^-</math>, <math>\text{CF}_3\text{SO}_3^-</math> and <math>\text{PF}_6^-</math>)</b> |            |                |
| T1304 +25 mM $C_8\text{mimCl}$                                                                                                                                                     | 13.3       | 0.21           |
| T1304 +50 mM $C_8\text{mimCl}$                                                                                                                                                     | 12.1       | 0.13           |
| T1304 +10 mM $C_8\text{mimBF}_4$                                                                                                                                                   | 13.7       | 0.17           |
| T1304 +25 mM $C_8\text{mimBF}_4$                                                                                                                                                   | 12.9       | 0.20           |
| T1304 +50 mM $C_8\text{mimBF}_4$                                                                                                                                                   | 11.4       | 0.15           |
| T1304 +10 mM $C_8\text{mimCF}_3\text{SO}_3$                                                                                                                                        | 13.8       | 0.20           |
| T1304 +25 mM $C_8\text{mimCF}_3\text{SO}_3$                                                                                                                                        | 13.0       | 0.17           |
| T1304 +50 mM $C_8\text{mimCF}_3\text{SO}_3$                                                                                                                                        | 11.0       | 0.23           |
| T1304 +5 mM $C_8\text{mimPF}_6$                                                                                                                                                    | 14.5       | 0.11           |
| T1304 +10 mM $C_8\text{mimPF}_6$                                                                                                                                                   | 15.7       | 0.09           |
| T1304 +25 mM $C_8\text{mimPF}_6$                                                                                                                                                   | 15.8       | 0.07           |

**Fig. S1**  $^1\text{H}$  NMR spectrum of 5% T1304 in the presence of different ILs [(i) none, (ii) 30mM  $\text{C}_4\text{mimCl}$  (iii) 30mM  $\text{C}_6\text{mimCl}$  (iv) 30mM  $\text{C}_8\text{mimCl}$  and (v) 30mM  $\text{C}_{10}\text{mimCl}$ ] varying in alkyl chain length fused with the imidazolium head group.

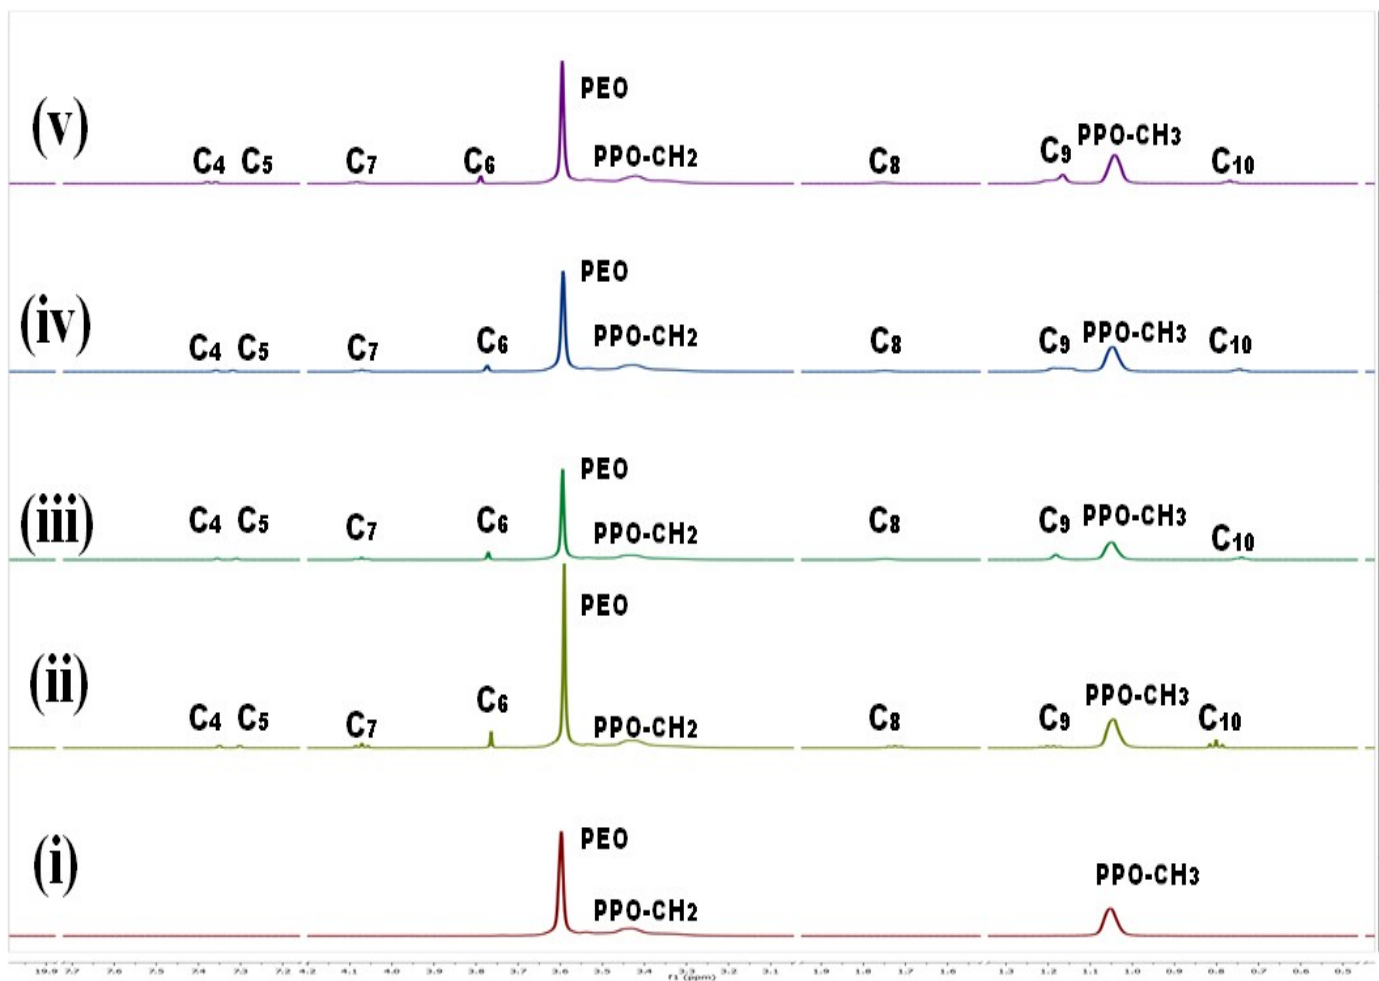

Supplement: c6ra17016a1.pdf [file c6ra17016a1.pdf]
